# Supplementary material for: Establishment of Multi-Dimensional Detection Series (MDS)&nbsp;For the Assessments of&nbsp;Gastric Motility Alterations in Patients With Functional Dyspepsia
Source: Research Square preprint supplement (doi:10.21203/rs.3.rs-128271/v1), 2020-12-30
Supplement: Supplementary file 2 [file e434274d0b4a7b5b8f2406bc.docx]

Appendix 1.

**FD Symptom questionnaire（Rome IV）**

| Frequency  Symptom | never had one.  （0） | 1-2 times per week  （1） | 3-5 times per week  （2） | 6-7 times per week  （3） |
| --- | --- | --- | --- | --- |
| Middle and upper abdominal pain |  |  |  |  |
| Epigastric burning |  |  |  |  |
| Postprandial fullness |  |  |  |  |
| Early satiety |  |  |  |  |
| Nausea |  |  |  |  |
| Eructation |  |  |  |  |
| Keck |  |  |  |  |
| Lack of appetite |  |  |  |  |
| Bouffant |  |  |  |  |
| Total frequency score |  | | | |
| Level  Symptom | Never had one.（0） | The symptoms are mild and do not affect daily life （1） | The symptoms are severe, and some of them affect daily life.  （2） | Serious symptoms, affecting daily life, difficult to stick to work  （3） |
| Middle and upper abdominal pain |  |  |  |  |
| Epigastric burning |  |  |  |  |
| Postprandial fullness |  |  |  |  |
| Early satiety |  |  |  |  |
| Nausea |  |  |  |  |
| Eructation |  |  |  |  |
| Keck |  |  |  |  |
| Lack of appetite |  |  |  |  |
| Bouffant |  |  |  |  |
| Total degree score |  | | | |
| Total score |  | | | |

Symptom duration：

PPI Drug use：
